# Supplementary material for: Glacier algae accelerate melt rates on the western Greenland Ice Sheet
Source: Copernicus journal article supplement (doi:10.5194/tc-2019-58), 2019-04-03
Supplement: Supplementary file [file tc-2019-58-AC2-supplement.pdf]

## Reviewer 1: Response to Review

We thank the reviewer for their efforts in reviewing our paper. We have reflected on the comments and addressed them as detailed below. We have made substantial changes to the manuscript. Please note that we have uploaded one revised manuscript to satisfy both sets of review comments.

**1) The title is too general, given that the algae observations are from a single field site and the surface runoff estimates are based on a transect with forcing data from three automatic weather stations. After reading the whole manuscript, I find that it is not so convincing that the field observations of this site are representative for the entire Greenland Ice Sheet**

With respect, we point out that nowhere in this manuscript do we claim that our field observations are representative of the whole ice sheet. Our analysis is constrained to the south western portion of the ice sheet, meaning we only assume our field observations are representative of the region delineated by Tedstone et al. (2017) with the southerly extent at 65 degrees and the northernmost extent at 70 degrees latitude, as shown in our Figure 4 (Figure 5 in revised m/s) and in our new figure 1. We drew the extent of our upscaling on Fig 1 to be clear.

That said, we have also visited a field site in the North West, near Upernavik, where we observed the same species of glacier algae acting as the primary albedo reducer on the ice surface. Detailed reports of algal abundance, mineralogy and albedo are not yet available, but this site was far outside of upscaling area used in this study and gives support to our upscaling within the south-western ablation zone. We agree that the scope of the upscaling could be made clearer in the manuscript, so we have altered the title and the terminology used throughout the manuscript to “south-western ablation zone” and adjusted the methods and discussion to better explain our spatial boundaries (detailed in response to later comments).

**2) The estimation of surface runoff caused by algae over the western GrIS is not clearly presented. Did you use the classification results from UAV and Sentinel-2 to estimate the surface runoff over the entire western GrIS? How? Your sentinel-2 and UAV imagery cover a very small portion of the western GrIS. How did you generalize the results? It seems that you only modeled the surface runoff over three points along a transect where forcing data from weather stations are available, and then extrapolated the runoff estimates across the whole area based on elevations. I believe there are lots of uncertainties here, even without considering the spatial heterogeneity of surface albedo. So in your abstract where you concluded that ‘algal growth led to an additional 5.5-8.0 Gt of runoff from the western sector of the GrIS in summer 2016’, an uncertainty estimate is mandatory**

We appreciate the comments and agree that this process could have been better explained in the manuscript, and that the reviewer has raised some important and interesting points. We have considered them deeply and adjusted our calculations and discussion accordingly, as discussed below. There is a lot to unpack in this comment so we have separated our responses to each point into responses a) to d) below:

a) *The estimation of surface runoff caused by algae over the western GrIS is not clearly presented*

We acknowledge that the reviewer did not find this part of the manuscript clearly presented so we have endeavoured to improve the presentation style and hope that the revised version is much more clear. In response to other comments we have made significant updates to the runoff modelling process and made extensive manuscript refinements to make the runoff modelling clearer and more tractable.

b) *Did you use the classification results from UAV and Sentinel-2 to estimate the surface runoff over the entire western GrIS? How?*

As explained above, our analysis was restricted to an area between 65° N and 70° N. We have adjusted our runoff modelling method in response to other comments in this review, now incorporating a point-surface energy balance model to quantify melting and associated uncertainty. We think this is now clearly explained in the revised manuscript in sections 2.6 and 2.10.

c) *Your sentinel-2 and UAV imagery cover a very small portion of the western GrIS. How did you generalize the results?*

Our UAV imagery covers a small part of the western GrIS but our Sentinel-2 data covers a much larger area. In the revised manuscript we focus on one high quality S-2 tile covering our field site without cloud obscuring the ice surface. Adjacent tiles were cloudy on the days surrounding our UAV flight. We consider the spatial coverage of algae in this tile to be representative of the south western ice sheet margin in our latitudinal range of interest. We also point out that our latitudinal range of interest is the same as that identified by Tedstone et al (2017) and only extends North as far as 70° N, an area we consider to be well represented by our remote sensing, and we do not draw any conclusions about ice

outside of this area in our paper. However, we do concede that this could be made more clear in the manuscript, and we have adjusted the terminology from “western GrIS” to “south-western GrIS” throughout the manuscript.

d) It seems that you only modeled the surface runoff over three points along a transect where forcing data from weather stations are available, and then extrapolated the runoff estimates across the whole area based on elevations. I believe there are lots of uncertainties here, even without considering the spatial heterogeneity of surface albedo. So in your abstract where you concluded that ‘algal growth led to an additional 5.5 - 8.0 Gt of runoff from the western sector of the GrIS in summer 2016’, an uncertainty estimate is mandatory

The runoff modelling was carried out as described in van As et al. (2017) and in our methods section and is indeed forced by meteorological data from three automatic weather stations, apart from albedo which is from MODIS and varies spatially. In van As et al.'s (2017) study they compared the performance of the model with independent observations and found the error to be negligible in the bare ice zone, with non-negligible error (underestimating runoff from snow by 0.5 m w.e.) above the snow line. Since we consider the K-transect to be broadly representative of the area over which we have upscaled, and all our runoff modelling has been limited to the bare ice zone, we maintain that this approach is valid. A much clearer quantification of uncertainty in the radiative forcing and melt attributed to algae is now included in the revised manuscript.

**3) Cook et al. attributed the albedo reduction to glacier algae because mineral dust was considered as less effective on albedo reduction based on the radiative transfer modeling. However, the surface meltwater itself has a significant role in reducing the albedo, which was not considered and evaluated**

It is true that we have not directly isolated and quantified the effects of meltwater ponding on albedo. However, our empirically derived estimates of albedo reduction and radiative forcing necessarily represent the total albedo reducing effects of the glacier algae including feedbacks to the optical properties of the underlying ice and associated meltwater. We have tried to explain the tight feedbacks between algal growth and ice surface development in the manuscript and the reasons why the albedo reducing effects of physical and biological processes are intricately interwoven. To borrow terminology from a previous paper, this is an example of a “biocryomorphic” process whereby the ice and the organisms growing on it co-evolve (Cook et al. 2015) – it is difficult to determine to what extent ice melts due to the glacier algae growing on it or the glacier algae grow due to nutrients and liquid water liberated from ice that is already melting, but we consider it safe to assume it is a combination of both, which is what makes algal growth an especially powerful albedo reducer, but also makes quantification of the albedo reducing effects of a single element in the system challenging. That said, we have provided the BioSNICAR\_GO model that employs geometrical optics in preference to Mie scattering to simulate the optical properties of the ice and the algae. In theory, increasing the ice grain size could adequately simulate the accumulation of interstitial meltwater since the refractive indices of ice and water are very similar and interstitial water replaces air-ice interfaces with water-ice interfaces. However, this would necessarily assume that meltwater accumulates in situ because we do not have a good method for simulating percolation and throughflow of meltwater, but we know it will vary dramatically according to the porosity of the weathered layer. Therefore, we consider the uncertainties in accounting for meltwater directly to be too large to include it in a quantitative manner in this study, but we point out that we have accounted for the “total” glacier algae albedo reducing effect that includes physical, biological and hydrological processes locked in a tight feedback, and explained these feedbacks in the manuscript. We have added more discussion of these concepts to the revised manuscript.

**4) Many critical details on methods and results are missing, which need clarifications. See specific comments below.**

We address these individually below.

**5) The overall writing needs to be improved, particularly the writing style. The method and result parts are poorly structured, which seem like a simple but loose stacking of various materials, while the logical linkages between different parts are weak and not clear. This study involves several different components, including fieldwork, radiative transfer modeling, image classification from UAV and Sentinel-2 data, and surface runoff modeling using ‘an SMB model.’ In the second section ‘Field sites and methods,’ all the materials related to those components are just put together, which are very difficult for readers to follow. There are also many redundant descriptions between the method and result parts, which seems like that this manuscript was not thoroughly proofread. There are also some grammar errors and typos**

We acknowledge the reviewer's comments on the writing style and have endeavoured to improve the manuscript for clarity. We hope that the revised manuscript is easier to follow.

**6) The most recent literature about ice algae mapping using remote sensing data is not cited and discussed, like: Wang, S., Tedesco, M., Xu, M., & Alexander, P. M. (2018). Mapping Ice Algal Blooms in Southwest**

Greenland From Space. *Geophysical Research Letters*, 45(21), 11,779–11,788. Huovinen, P., Ramírez, J., & Gómez, I. (2018). Remote sensing of albedo-reducing snow algae and impurities in the Maritime Antarctica. *ISPRS Journal of Photogrammetry and Remote Sensing: Official Publication of the International Society for Photogrammetry and Remote Sensing*, 146, 507–517. Both these two papers are using remote sensing data to detect snow/ice algae. Although the second paper is dealing with snow algae, the first paper is utilizing the chlorophyll-a signature to map ice algae from satellite imagery over the southwestern GrIS. Your presented field data and radiative transfer modeling results (particularly your Figure 2A) are consistent with Wang et al. (2018) who used the reflectance ratio between 709 and 673 nm to quantify the ice algae

*The reviewer is correct that we had not sufficiently cited those papers, for the following reasons:*

1) Huovinen et al. 2011 focuses entirely on snow algae. This is a drastically different system to the glacier algae we concentrate on in our study, and we considered discussion of this paper to be tangential. However, we have incorporated a brief mention of the paper, and why their methods cannot be transferred from snow to ice ecosystem in the introduction.

2) Wang et al. (2018) used the vegetation red-edge to map glacier algae; however, the vegetation red-edge can be vulnerable to false positives due to mineral dusts, especially where the proportion of red minerals is high (Cook et al 2017). We attempted to use the vegetation red-edge on our spectra and achieved only ~80% accuracy for identifying algal ice compared to our random forest classifier that achieves >95% accuracy. Furthermore, the red-edge can only provide a binary classification where a pixel is either biological or not. Our classifier can map a range of ice surfaces – we chose five classes that we consider to be representative of the majority of the ablation zone. Wang et al. (2018) used Sentinel-3 OLCI data that has a ground resolution of 300 m to quantify algae. At this ground resolution the uncertainty due to spatial heterogeneity is surely large, especially because the underlying ice optics and mixing of various impurities were not accounted for, and there is no direct ground validation that could ameliorate some of these various sources of uncertainty. For these reasons we did not wish to benchmark our work against that paper.

*However, we have now added discussion of both papers to our revised manuscript.*

#### **Specific comments.**

**Introduction:** This section should be expanded, at least including a more detailed literature review about the current research progress and efforts on ice algae and their relationship with albedo and surface melting.

*We have expanded the introduction as requested*

**Line 62.** The study by Wang et al. (2018) should be cited, which used the spectral signature of chlorophyll-a to map ice algae in Greenland.

*We have added the citation*

**Line 78.** Adjust your figures. It's a bit odd to put your first figure in the text as Figure 3c.

*We have adjusted our figures*

**Line 86.** Do you have multiple sites? What's your sampling area size? Did you take point measurements at different places within a specific area? Explain those details in your field site description part.

*We have updated our methodology to clarify these points*

**Line 99.** Update your reference 'Cook et al. (2017b)' in the reference list.

*The reference has been updated*

**2.3 Biological Measurements.** Did you also differentiate different species when counting the cells?

*Yes we differentiated between the species, this is now made explicit in the revised manuscript*

**Line 126.** What is PSD? Particle size distribution? Do not use abbreviation when you use the term first time in your manuscript.

PSD stands for particle size distribution. The manuscript has been amended so that the abbreviation is defined on first use.

**Line 135. Provide more details on how you used the ASD to measure the surface reflectance of the materials pressed on the microscope slide, such as your measurement setup, the field view of the ASD probe, and the background material (white, grey, or black) where you put your microscope slide.**

*The bare fibre of the ASD field Spec was inserted into the viewing port of the integrating sphere. The integrating sphere is a hollow sphere with the inner surface covered in a near-Lambertian coating that makes the light reaching the fibre diffuse. The sphere has a set of circular apertures that can be opened to insert samples and to allow a light source to illuminate the interior. One aperture was opened and the sample was pressed into it. This aperture was positioned at the bottom of the sphere so that the apparatus could be lowered onto the sample which was arranged into an optically thick layer (~3mm thick) on a microscope slide which in turn was on an opaque white stopper beneath, meaning the sample could remain in a stable position throughout the measurement.*

*This is now clarified in the revised manuscript.*

**Line 144. Any references for the BioSNICAR\_GO? Is BioSNICAR developed for this study? Provide more details.**

*BioSNICAR\_GO was developed for this study, building major advances on top of the BioSNICAR software published in Cook et al. (2017b). We have added more details to the revised manuscript including a new figure showing a schematic of the model structure. We direct the reviewer to the documentation provided in our repository at the doi provided or on Github at [www.github.com/jmcook1186/BioSNICAR\\_GO](http://www.github.com/jmcook1186/BioSNICAR_GO)*

**Section 2.5 paragraph 2. As I asked before if you considered the different cell numbers of different algal species, did you take into account the different shapes of the *Ancylonema nordenskiöldii*, *Mesotaenium berggrenii*? *Ancylonema nordenskiöldii* is filamentous while *Mesotaenium berggrenii* is unicellular. If you consider the geometrical optics, how would these two different shapes affect the radiative transfer modeling? Can you comment on the sensitivity of radiative transfer modeling on algal cell shapes? Can you combine sections 2.5 and 2.6?**

*We did include different algae in our radiative transfer model to account for both of the dominant species. We found the albedo to be insensitive to cell dimensions within a realistic range of lengths and widths. We simulated chains of cells as continuous cylinders as mentioned in the existing text, supported by Hillebrand et al (1999) and Lee and Pilon (2003). We have added the following explanatory text to our manuscript to clarify:*

*“This was undertaken for a range of cell dimensions that are now available in the lookup library for BioSNICAR\_GO. For this study, we included two classes of glacier algae representing *Mesotaenium berggrenii* and *Ancylonema nordenskiöldii* with length and width and also the relative abundance of each species matching the means measured in our microscopy described in Section 2.3. In simulations not shown here the albedo was relatively insensitive to the dimensions of the cells within a realistic range of lengths and widths. For example, in a simulation with constant ice optics (snow of constant grain size 400  $\mu\text{m}$ , density 400  $\text{kg m}^{-3}$  and snowpack thickness 50 mm) and a biomass mixing ratio of  $10^5$  ppb changing the length of the algal cells from 10 to 40  $\mu\text{m}$  changed the albedo by less than 0.4%. The albedo was more sensitive to cell width; with the same ice optics and biomass mixing ratio as described above and an algal cell 40  $\mu\text{m}$  long, changing the cell width from 4  $\mu\text{m}$  to 12  $\mu\text{m}$  changed the surface albedo by 0.8%. This low sensitivity is likely because all of the cells considered here are large from a radiative transfer perspective.”*

**Line 187. ‘utilise 5% of this ...’ any references for this?**

*In the absence of in situ measurements of photosynthetic efficiency in our study or any past study, and acknowledging high sensitivity to local environmental conditions, we took a realistic value from the literature for other photosynthetic microalgae. This was also corroborated by personal communications with Chris Williamson (Univ. Bristol) who is preparing a manuscript on the photosynthetic efficiency of these specific algae. We chose to take a value at the upper end of the realistic range because this translates into a conservative estimate for algal melt acceleration (since a larger portion of the energy is used photosynthetically rather than transferring into the surrounding ice. We have added further details to the revised manuscript.*

**Line 191. determine -> determined**

*corrected*

**Section 2.7 paragraph 2. This paragraph is overall difficult to read. Could you use some equations to show your calculations?**

*This section has been rewritten for clarity.*

**2.8 UAV remote sensing. When did you conduct the UAV mapping, the same time with your field spectral collection? Also specify the multispectral camera parameters, like band wavelength, bandwidth and so on.**

*We have added further details regarding the camera specification.*

**Line 210. oin -> in**

*corrected*

**Line 216. What do you mean by time-dependent regression?**

*This is now explained in the manuscript as follows:*

*“We then converted from radiance to reflectance using time-dependent regression between images of the MicaSense Calibrated Reflectance Panel acquired before and after each flight (i.e. a regression line was computed between the reflectance of the white reference panel at the start and end of the flight and used to quantify the change in irradiance during the flight). This was used to calibrate the UAV multispectral images to reflectance.”*

**Line 222. What do you mean by ‘generally good’? Move this to the results or discussion part and make clarifications.**

*There was generally close agreement between the albedo estimates although in some cases variations in the radiometric calibration of each sensor led to some non-negligible differences. This is fully discussed in a separate manuscript recently submitted to this journal.*

**Section 2.9. It’s very odd to have just two sentences in a single section. You should combine this with classification, or introduce more about the Sentinel-2 data. How does the Sen2Cor perform? Can you provide a figure showing the atmospherically corrected surface reflectances of Sentinel-2 data? What are the acquisition dates of your Sentinel-2 data?**

*These details have now been added to the revised manuscript*

**Line 231. remove the word ‘novel’ as random forest classification has been widely used.**

*Whilst this is true, we maintain that the application of the random forest classifier to mapping glacier algae, and the idea of training on reduced field spectroscopy data to overcome issues of spatial heterogeneity, are highly novel.*

**Line 234. What tiles? Sentinel-2?**

*Yes, this is now explicit in the manuscript*

**Line 236. How did you reduce the ASD spectra to the UAV bands considering the difference between their bandwidth? Please clarify.**

*We used the ASD wavelengths equal to the center wavelength of the camera bands.*

**Line 240. This part is not clear. The reflectances at five wavelengths (reduced from ASD spectra?) were used as the feature vector, what’s your classification vector? How many classes and what classes you were training? How many training samples do you have?**

*This information is all available in the manuscript and in the documented code in our repository, but we apologise if it is not sufficiently clear. To clarify, we trained our model on ASD reflectance reduced to either 5 wavelengths (in the case of UAV imagery) or nine wavelengths (in the case of Sentinel-2 imagery). The reflectance at each of these wavelengths was the feature vector, and the surface class associated with the sample surface was used as the classification vector. There are six possible surface classes in our model: HA, LA, CI, CC, WAT, SN referring to heavy algal bloom, light algal bloom, clean ice, cryoconite, water and snow. We had 174 training examples concentrated into HA, LA, CI and SN, with fewer examples of WAT and CC. WAT and CC are relatively easy for the classifier to identify,*

being very low albedo with flattish spectra. We ensured that there were multiple examples of each class in both the training and test sets. The diagram attached here as Figure 1 has been added to our supplementary information.

We consider this method of training on ground spectra to be a significant advance from prior classification techniques in the cryosphere literature for several reasons:

1) For every sample, we have complete confidence in the labelling because we have removed the surface ice and analysed it in the laboratory as well as recording on-site metadata

2) We have minimised error due to surface heterogeneity. Since the surface classes are patchy, often with relatively small length scales, post-hoc labelling of aerial imagery is more likely to either be misclassified or classify ambiguous spectra. Our method ensures that the reflectance spectra is derived from a homogenous surface with a definite label as explained in point 1).

3) Training on reduced hyperspectral data makes the whole classification method sensor-agnostic, i.e. the training set could easily be resampled to train for a different satellite platform or multispectral camera, greatly enhancing the reuseability of the hard-won ground data.

4) We have provided a completely open code resource where the spectral library can (and will) be appended to as more spectra (gathered using any of the industry standard VIS-NIR spectroradiometers such as the ASD Field Spec) become available from our follow-on projects and – we hope – other researchers. The model can then be retrained sequentially as the training set grows. That said, although our existing training set is small, the performance in hold-out training is very good.

#### **Line 269. clarify the ‘rolling-window approach’ or use reference**

The rolling window approach is explained in full in Tedstone et al (2017) as follows:

“Each year, we identified the first rolling window at each pixel that contained atleast 3 days of bare or dark ice (not necessarily consecutive) and 0 days of non-bare or non-dark ice, which therefore permitted up to 4 days of cloud cover in the window. We then selected the first day of bare or dark ice appearance from within the chosen window. This windowing strategy enabled us to minimise the likelihood of false-positive identification of bare and dark ice appearance dates which would have occurred if only looking at daily observations in isolation and also allowed us to ameliorate for cloud cover.”

We have added citation to this paper in the text.

#### **Line 271-276. Rewrite this part. Specify your surface class.**

We have rewritten this section for clarity

#### **Line 283. ‘surface albedo is adjusted from MODIS...’ How?**

“adjusted” is a mistype – removed. The albedo is simply the albedo predicted by MODIS MOD10A1.

**2.12 Runoff modeling. What’s the relationship between your remote sensing classification and runoff modeling. Did you use the classification results to constrain your runoff modeling? Uncertainty estimation should be included. The surface runoff estimation is not rigorous considering the albedo difference.**

We have added significantly to the methodology and discussion to address these points in the revised manuscript.

#### **Line 301-307. Combine these texts with your field site and measurements description in section 2.**

We have adjusted the manuscript accordingly.

**Line 312-313: Does the number after ‘+/-’ mean standard deviation? Change the symbol to ‘±’. What standards did you take to separate the samples into those four classes? Can you show the histogram of your samples and the separating boundaries of the classes?**

The surface classes were separated by visual assessment of the ice surface made at the same time as the albedo measurements were made and the sample removed. The stated mean +/- standard deviation for the cell abundance for

each surface class was derived from counting cells in microscope images of melted ice samples for those same surfaces, as described in the methodology. To demonstrate the separation between the surface classes I have provided a histogram as Figure 2 attached here, please note the unequal bin widths as the cell counts cover 4 orders of magnitude.

**Line 360. Plot the absorption spectrum for the purpurogallin pigment, with other photosynthetic and photoprotective pigments.**

*We have added a plot showing the absorption spectra for the algal pigments to Supplementary Information*

**Line 374. Be cautious about making this conclusion based on your field measurements over just one specific area.**

*We have made major revisions to the manuscript that address this comment*

**Line 383-385. You didn't take any biological measurements over those 'wavy' areas. Generalizing your single-site observation to the entire GrIS is inappropriate.**

*The wavy areas are common to the Dark Zone and are presented by Wientjes et al (2010, 2011) as evidence in favour of geological darkening. We simply provide counter evidence that suggests that while the wavy pattern may well signify geologic controls on spatial patterns within the Dark Zone, we do not believe the darkening to result from the presence of dark minerals – more likely the minerals stimulate algal growth*

**Section 3.5. This part needs to be rewritten. Many texts should go to the methods section. I find that this manuscript has a lot of those redundant descriptions. Some texts should be in the previous section but were put in the results section. Can you plot out the spectra (reduced to UAV and Sentinel-2 bands) of the four different classes, in comparison with your original ASD spectra? The ASD spectra may well differentiate four different classes, but the reduced spectra would mask out lots of unique spectral signatures considering the coarse spectral resolutions. Otherwise, your classification (no matter what advanced methods to be used) is not supported. Besides, you should also plot out the real UAV and Sentinel-2 spectra, in comparison with your ASD spectra.**

*We have considered this and taken into account the important difference between hyperspectral data generated using the ASD Field Spec and the multispectral data acquired by our camera or Sentinel-2, and we do feel this is explained in the manuscript. With respect we point to the following passage that clearly states this for the UAV:*

*Line 235: "Our directional reflectance measurements were first reduced to reflectance values at five key wavelengths coincident with the centre wavelengths measured by the MicaSense Red-Edge camera mounted to our UAV (blue: 0.475, green: 0.560, red: 0.668, red-edge: 0.717, NIR: 0.840  $\mu\text{m}$ )."*

*and then for Sentinel-2:*

*Line 249: "This protocol was then repeated for Sentinel-2 imagery. In that case the directional reflectance data was reduced to eight bands coincident with the centre wavelengths measured by Sentinel-2 at 20m ground resolution (0.48, 0.56, 0.665, 0.705, 0.740, 0.788, 0.865, 1.610  $\mu\text{m}$ )."*

*However, we have rewritten for clarity as explained in the response to a previous similar comment above. The trained classifier is not picking out spectral features only present in hyperspectral data. We are sure of this because the classifier is trained on the reflectance at only the reduced set of wavelengths.*

**Line 444. The this -> The.**

*Thank you, amended.*

**Section 3.8. Discuss the potential impact of meltwater itself.**

*We have added discussion of this to the revised manuscript*

**Table 1. explain the abbreviation in your table title or put a note on this.**

*Amended*

**References:**

Cook J, Edwards A and Hubbard A (2015) Biocryomorphology: Integrating Microbial Processes with Ice Surface Hydrology, Topography, and Roughness. *Front. Earth Sci.* 3:78. doi: 10.3389/feart.2015.00078

Cook JM, Hodson AJ, Gardner AS, Flanner M, Tedstone AJ, Williamson C, Irvine-Fynn TD, Nilsson J, Bryant R, Tranter M. 2017. Quantifying bioalbedo: A new physically-based model and critique of empirical methods for characterizing biological influence on ice and snow albedo. *The Cryosphere*: 1–29. DOI: 10.5194/tc-2017-73. 2017b

Hillebrand H, Dürselen C-D, Kirschtel D. et al (1999) Biovolume calculation for pelagic and benthic microalgae. *J Phycol* 1999;35:403–24

Lee, E., Pilon, L. (2013) Absorption and scattering by long and randomly oriented linear chains of spheres. *Journal of the Optical Society of America*, 30 (9): 1892- 1900

Tedstone, A.J., Bamber, J.L., Cook, J.M., Williamson, C.J., Fettweis, X., Hodson, A.J., Tranter, M., 2017, Dark ice dynamics of the south-west Greenland Ice Sheet, *The Cryosphere Discuss*, doi: <https://www.the-cryosphere-discuss.net/tc-2017-79/>

Wang, S., Tedesco, M., Xu, M., & Alexander, P. M. ( 2018). Mapping ice algal blooms in southwest Greenland from space. *Geophysical Research Letters*, 45, 11,779– 11,788. <https://doi.org/10.1029/2018GL080455>

Wientjes, I. G. M., Oerlemans, J. (2010) An explanation for the dark region in the western melt zone of the Greenland ice sheet, *The Cryosphere*, 4, 261–268, <https://doi.org/10.5194/tc-4-261-2010>.

Wientjes, I.G.M., Van de Wal, R.S.W., Reichert, G.J., Sluijs, A., Oerlemans, J. (2011). Dust from the dark region in the western ablation zone of the Greenland Ice Sheet. *The Cryosphere*, 5, 589–601, 2011, doi:10.5194/tc-5-589-2011
